# Supplementary material for: Translation, validity, and reliability of the European Portuguese version of the Touch Experiences and Attitudes Questionnaire
Source: PeerJ journal article supplement (doi:10.7717/peerj.14960), 2023-04-03
Supplement: Appendix_A.pdf [file Appendix_A.pdf]

## European Portuguese version of the Touch Experiences and Attitudes Questionnaire (TEAQ)

Por favor, leia com atenção as seguintes afirmações e selecione a opção que indica o quanto concorda ou discorda com cada uma das afirmações.

|                                                                                                  | Discordo completamente | Discordo um pouco | Não concordo nem discordo | Concordo um pouco | Concordo completamente |
|--------------------------------------------------------------------------------------------------|------------------------|-------------------|---------------------------|-------------------|------------------------|
| 1. Eu não gosto quando as pessoas são muito afetuosas fisicamente em relação a mim.              |                        |                   |                           |                   |                        |
| 2. Eu gosto de usar loções corporais.                                                            |                        |                   |                           |                   |                        |
| 3. Eu tenho de conhecer alguém relativamente bem para desfrutar do seu abraço.                   |                        |                   |                           |                   |                        |
| 4. Eu considero que é natural cumprimentar os meus amigos e familiares com um beijo na bochecha. |                        |                   |                           |                   |                        |
| 5. Houve muito afeto físico durante a minha infância.                                            |                        |                   |                           |                   |                        |
| 6. Em criança, eu costumava abraçar os membros da minha família frequentemente.                  |                        |                   |                           |                   |                        |
| 7. Eu gosto de usar essências de banho quando tomo banho.                                        |                        |                   |                           |                   |                        |
| 8. Eu considero que acariciar o cabelo de uma pessoa que gosto é muito agradável.                |                        |                   |                           |                   |                        |
| 9. Os meus pais não foram muito afetuosos fisicamente em relação a mim durante a minha infância. |                        |                   |                           |                   |                        |
| 10. Eu gosto de adormecer nos braços de alguém de quem sou próximo(a).                           |                        |                   |                           |                   |                        |
| 11. Eu costumo aconchegar-me no sofá com alguém.                                                 |                        |                   |                           |                   |                        |
| 12. Eu gosto da intimidade física dos preliminares sexuais.                                      |                        |                   |                           |                   |                        |

|                                                                                                                        | Discordo completamente | Discordo um pouco | Não concordo nem discordo | Concordo um pouco | Concordo completamente |
|------------------------------------------------------------------------------------------------------------------------|------------------------|-------------------|---------------------------|-------------------|------------------------|
| 13. Eu gosto de dar o braço aos meus amigos e familiares enquanto ando.                                                |                        |                   |                           |                   |                        |
| 14. Eu normalmente abraço os meus familiares e amigos quando estou a despedir-me.                                      |                        |                   |                           |                   |                        |
| 15. Em criança, receber um abraço dos meus pais quando eu estava triste fazia com que eu me sentisse muito mais feliz. |                        |                   |                           |                   |                        |
| 16. É bom quando amigos e membros da família me cumprimentam com um beijo.                                             |                        |                   |                           |                   |                        |
| 17. Eu costumo dar as mãos a alguém que conheço intimamente.                                                           |                        |                   |                           |                   |                        |
| 18. Quando eu estou triste, geralmente há alguém que me consegue confortar.                                            |                        |                   |                           |                   |                        |
| 19. Beijar é uma boa forma de expressar atração física.                                                                |                        |                   |                           |                   |                        |
| 20. Eu abraço regularmente pessoas de quem sou próximo(a).                                                             |                        |                   |                           |                   |                        |
| 21. Em criança, os meus pais aconchegavam-me na cama todas as noites e davam-me um abraço e um beijo de boa noite.     |                        |                   |                           |                   |                        |
| 22. Eu gosto quando a minha pele é acariciada.                                                                         |                        |                   |                           |                   |                        |
| 23. Eu costumo tomar um duche ou um banho com alguém.                                                                  |                        |                   |                           |                   |                        |
| 24. Eu gosto de fazer sexo.                                                                                            |                        |                   |                           |                   |                        |
| 25. Eu faço sexo frequentemente.                                                                                       |                        |                   |                           |                   |                        |
| 26. Eu não gosto de ter proximidade física com pessoas que não conheço bem.                                            |                        |                   |                           |                   |                        |

|                                                                                                                                | Discordo completamente | Discordo um pouco | Não concordo nem discordo | Concordo um pouco | Concordo completamente |
|--------------------------------------------------------------------------------------------------------------------------------|------------------------|-------------------|---------------------------|-------------------|------------------------|
| 27. Eu consigo sempre encontrar alguém para me confortar fisicamente quando não me sinto bem                                   |                        |                   |                           |                   |                        |
| 28. Eu cumprimento sempre os meus amigos e familiares dando-lhes um abraço.                                                    |                        |                   |                           |                   |                        |
| 29. Eu aprecio ser abraçado(a) por alguém de quem gosto.                                                                       |                        |                   |                           |                   |                        |
| 30. A minha mãe dava-me banho regularmente quando eu era criança.                                                              |                        |                   |                           |                   |                        |
| 31. Em criança, os meus pais confortavam-me sempre quando eu estava triste.                                                    |                        |                   |                           |                   |                        |
| 32. Eu gosto da sensação da minha pele a tocar na de outra pessoa se eu a conhecer intimamente.                                |                        |                   |                           |                   |                        |
| 33. Em criança, os meus pais costumavam dar-me a mão quando eu caminhava com eles.                                             |                        |                   |                           |                   |                        |
| 34. Na maioria dos dias eu recebo um abraço ou um beijo.                                                                       |                        |                   |                           |                   |                        |
| 35. Se alguém que eu não conheço muito bem coloca a sua mão de forma amigável no meu braço, isso faz-me sentir desconfortável. |                        |                   |                           |                   |                        |
| 36. Eu costumo ter contacto físico com os meus amigos e familiares quando estou com eles.                                      |                        |                   |                           |                   |                        |
| 37. Faz-me sentir desconfortável se alguém que eu não conheço muito bem me toca de uma maneira amigável.                       |                        |                   |                           |                   |                        |
| 38. Eu aprecio dar a mão a alguém de quem gosto.                                                                               |                        |                   |                           |                   |                        |
| 39. Eu costumo partilhar um beijo romântico com frequência.                                                                    |                        |                   |                           |                   |                        |
| 40. Eu gosto de exfoliar a minha pele.                                                                                         |                        |                   |                           |                   |                        |

|                                                                                        | Discordo completamente | Discordo um pouco | Não concordo nem discordo | Concordo um pouco | Concordo completamente |
|----------------------------------------------------------------------------------------|------------------------|-------------------|---------------------------|-------------------|------------------------|
| 41. Beijar é uma parte agradável de expressar sentimentos românticos.                  |                        |                   |                           |                   |                        |
| 42. A minha pele é acariciada frequentemente.                                          |                        |                   |                           |                   |                        |
| 43. Eu costumo dar a mão a alguém de quem gosto.                                       |                        |                   |                           |                   |                        |
| 44. Eu gosto de acariciar a pele de alguém que eu conheço intimamente.                 |                        |                   |                           |                   |                        |
| 45. Eu consigo ser abraçado(a) por relativamente muitas pessoas.                       |                        |                   |                           |                   |                        |
| 46. Eu costumo adormecer enquanto abraço alguém de quem eu sou próximo(a).             |                        |                   |                           |                   |                        |
| 47. Abraçar alguém no sofá é muito bom.                                                |                        |                   |                           |                   |                        |
| 48. Eu costumo colocar o braço sobre um amigo próximo enquanto caminhamos juntos.      |                        |                   |                           |                   |                        |
| 49. Eu gosto de tomar banho com muita espuma.                                          |                        |                   |                           |                   |                        |
| 50. Eu gosto de usar máscaras faciais na minha pele.                                   |                        |                   |                           |                   |                        |
| 51. Eu gosto quando os meus amigos e familiares me cumprimentam dando-me um abraço.    |                        |                   |                           |                   |                        |
| 52. Eu costumo andar de braços dados com os meus amigos e familiares quando passeamos. |                        |                   |                           |                   |                        |

The item numbers below identify which subscale each item corresponds to (**R** identifies items that are reverse scored):

*Friends and family touch* (FFT) (11 items): 4, 13, 14, 16, 20, 28, 36, 45, 48, 51, 52;

*Current intimate touch* (CIT) (11 items): 11, 17, 18, 23, 25, 27, 34, 39, 42, 43, 46;

*Childhood touch* (ChT) (8 items): 5, 6, 9**R**, 15, 21, 30, 31, 33;

*Attitude to self-care* (ASC) (5 items): 2, 7, 40, 49, 50;

*Attitude to intimate touch* (AIT) (12 items): 8, 10, 12, 19, 22, 24, 29, 32, 38, 41, 44, 47;

*Attitude to unfamiliar touch* (AUT) (5 items): 1**R**, 3**R**, 26**R**, 35**R**, 37**R**.
