# Supplementary material for: Translation, validity, and reliability of the European Portuguese version of the Touch Experiences and Attitudes Questionnaire
Source: PeerJ journal article supplement (doi:10.7717/peerj.14960), 2023-04-03
Supplement: Item.pdf [file Item.pdf]

### Item-total and mean inter-item correlations

Table 1 shows the item-total correlations for each item of the TEAQ subscales. The mean inter-item is .46 for FFT, .40 for CIT, .53 for ChT, .46 for ASC, .40 for AIT, and .41 for AUT.

**Table 1.** Item-total correlations for each item of the TEAQ subscales.

| <b>Factor and items</b> | <b>Item-total correlation</b> |
|-------------------------|-------------------------------|
| <i>FFT</i>              |                               |
| Q4                      | .45                           |
| Q13                     | .66                           |
| Q14                     | .70                           |
| Q16                     | .63                           |
| Q20                     | .72                           |
| Q28                     | .72                           |
| Q36                     | .70                           |
| Q45                     | .57                           |
| Q48                     | .56                           |
| Q51                     | .71                           |
| Q52                     | .63                           |
| <i>CIT</i>              |                               |
| Q11                     | .57                           |
| Q17                     | .54                           |
| Q18                     | .45                           |
| Q23                     | .53                           |
| Q25                     | .63                           |
| Q27                     | .43                           |
| Q34                     | .60                           |
| Q39                     | .75                           |
| Q42                     | .77                           |
| Q43                     | .65                           |
| Q46                     | .60                           |
| <i>ChT</i>              |                               |
| Q5                      | .79                           |
| Q6                      | .71                           |
| Q9                      | .72                           |
| Q15                     | .65                           |
| Q21                     | .67                           |
| Q30                     | .49                           |
| Q31                     | .81                           |
| Q33                     | .68                           |
| <i>ASC</i>              |                               |
| Q2                      | .62                           |
| Q7                      | .67                           |
| Q40                     | .64                           |
| Q49                     | .44                           |
| Q50                     | .61                           |
| <i>AIT</i>              |                               |
| Q8                      | .50                           |
| Q10                     | .52                           |
| Q12                     | .66                           |

|            |     |
|------------|-----|
| Q19        | .44 |
| Q22        | .66 |
| Q24        | .53 |
| Q29        | .59 |
| Q32        | .66 |
| Q38        | .57 |
| Q41        | .68 |
| Q44        | .69 |
| Q47        | .65 |
| <i>AUT</i> |     |
| Q1         | .38 |
| Q3         | .47 |
| Q26        | .55 |
| Q35        | .69 |
| Q37        | .69 |
