# Supplementary material for: Translation, validity, and reliability of the European Portuguese version of the Touch Experiences and Attitudes Questionnaire
Source: PeerJ journal article supplement (doi:10.7717/peerj.14960), 2023-04-03
Supplement: MCFA.pdf [file MCFA.pdf]

## Multi-group Confirmatory Factor Analysis

A multi-group confirmatory factor analysis between the two groups (female and male) was made to examine factor invariance. Tables 1 and 2 provide the factors, items, and standardized loadings for the combined, female, and male data, for the six-factor model and for the parcelled six-factor model, respectively. These results show that the items are comparable separate and combined, functioning in a similar way across groups, and that both can produce equivalent results.

**Table 1.** Standardized loadings for the six-factor model for combined, female, and male data.

| Factor and items | Factor loadings |        |      |
|------------------|-----------------|--------|------|
|                  | Combined data   | Female | Male |
| <i>FFT</i>       |                 |        |      |
| Q4               | .59             | .60    | .54  |
| Q13              | .68             | .66    | .73  |
| Q14              | .76             | .75    | .82  |
| Q16              | .67             | .69    | .59  |
| Q20              | .78             | .77    | .80  |
| Q28              | .77             | .76    | .81  |
| Q36              | .74             | .74    | .75  |
| Q45              | .61             | .61    | .64  |
| Q48              | .57             | .55    | .61  |
| Q51              | .70             | .71    | .66  |
| Q52              | .64             | .62    | .68  |
| <i>CIT</i>       |                 |        |      |
| Q11              | .61             | .60    | .57  |
| Q17              | .61             | .61    | .55  |
| Q18              | .45             | .37    | .67  |
| Q23              | .56             | .64    | .27  |
| Q25              | .68             | .75    | .52  |
| Q27              | .44             | .37    | .62  |
| Q34              | .66             | .62    | .74  |
| Q39              | .81             | .83    | .78  |
| Q42              | .82             | .84    | .69  |
| Q43              | .71             | .69    | .69  |
| Q46              | .64             | .64    | .62  |
| <i>ChT</i>       |                 |        |      |
| Q5               | .84             | .86    | .82  |
| Q6               | .78             | .77    | .84  |
| Q9               | .78             | .76    | .89  |
| Q15              | .69             | .74    | .53  |
| Q21              | .69             | .69    | .72  |
| Q30              | .51             | .52    | .41  |
| Q31              | .84             | .85    | .74  |
| Q33              | .71             | .72    | .64  |
| <i>ASC</i>       |                 |        |      |
| Q2               | .74             | .69    | .78  |
| Q7               | .77             | .75    | .80  |
| Q40              | .71             | .66    | .58  |
| Q49              | .50             | .45    | .41  |

|            |     |     |     |
|------------|-----|-----|-----|
| Q50        | .66 | .57 | .50 |
| <i>AIT</i> |     |     |     |
| Q8         | .53 | .50 | .60 |
| Q10        | .56 | .62 | .40 |
| Q12        | .69 | .70 | .72 |
| Q19        | .47 | .50 | .41 |
| Q22        | .71 | .70 | .70 |
| Q24        | .58 | .62 | .61 |
| Q29        | .63 | .58 | .72 |
| Q32        | .70 | .70 | .77 |
| Q38        | .62 | .63 | .57 |
| Q41        | .71 | .69 | .81 |
| Q44        | .75 | .73 | .80 |
| Q47        | .70 | .69 | .71 |
| <i>AUT</i> |     |     |     |
| Q1         | .39 | .34 | .59 |
| Q3         | .48 | .42 | .58 |
| Q26        | .55 | .54 | .52 |
| Q35        | .89 | .91 | .80 |
| Q37        | .89 | .89 | .84 |

**Table 2.** Standardized loadings for the parcelled six-factor model for combined, female, and male data.

| Factor and items    | Factor loadings |        |      |
|---------------------|-----------------|--------|------|
|                     | Combined data   | Female | Male |
| <i>FFT</i>          |                 |        |      |
| Q28, 48, 52         | .81             | .80    | .83  |
| Q13, 14, 20, 51     | .93             | .92    | .96  |
| Q4, 16, 36, 45      | .80             | .79    | .79  |
| <i>CIT</i>          |                 |        |      |
| Q17, 18, 34, 39     | .89             | .89    | .98  |
| Q11, 23, 25, 27     | .79             | .82    | .64  |
| Q42, 43, 46         | .88             | .87    | .80  |
| <i>ChT</i>          |                 |        |      |
| Q9, 21              | .81             | .81    | .81  |
| Q5, 15, 30          | .86             | .86    | .86  |
| Q6, 31, 33          | .97             | .97    | .92  |
| <i>ASC</i>          |                 |        |      |
| Q50                 | .68             | .58    | .54  |
| Q2, 7               | .78             | .75    | .82  |
| Q40, 49             | .79             | .73    | .70  |
| <i>AIT</i>          |                 |        |      |
| Q19, 24, 32, 44     | .83             | .85    | .86  |
| Q8, 12, 41          | .81             | .81    | .83  |
| Q10, 22, 29, 38, 47 | .86             | .85    | .84  |
| <i>AUT</i>          |                 |        |      |
| Q37                 | .74             | .73    | .72  |
| Q1, 35              | .93             | .92    | .94  |
| Q3, 26              | .59             | .55    | .65  |
