# Supplementary material for: Translation, validity, and reliability of the European Portuguese version of the Touch Experiences and Attitudes Questionnaire
Source: PeerJ journal article supplement (doi:10.7717/peerj.14960), 2023-04-03
Supplement: Pearson.pdf [file Pearson.pdf]

## Pearson correlations between items and items means and standard deviations

Table 1 shows items means and standard deviations and Table 2 shows Pearson correlations between items.

**Table 1.** Items means and standard deviations

| Items   | Mean | SD   | N   |
|---------|------|------|-----|
| TEAQ_1  | 3,08 | 1,24 | 384 |
| TEAQ_2  | 3,54 | 1,28 | 384 |
| TEAQ_3  | 1,83 | 1,07 | 384 |
| TEAQ_4  | 3,95 | 1,15 | 384 |
| TEAQ_5  | 3,82 | 1,17 | 384 |
| TEAQ_6  | 3,65 | 1,27 | 384 |
| TEAQ_7  | 3,05 | 1,31 | 384 |
| TEAQ_8  | 4,24 | 0,97 | 384 |
| TEAQ_9  | 3,82 | 1,28 | 384 |
| TEAQ_10 | 4,01 | 1,09 | 384 |
| TEAQ_11 | 3,55 | 1,31 | 384 |
| TEAQ_12 | 4,44 | 0,84 | 384 |
| TEAQ_13 | 3,24 | 1,36 | 384 |
| TEAQ_14 | 3,51 | 1,34 | 384 |
| TEAQ_15 | 4,03 | 1,01 | 384 |
| TEAQ_16 | 3,54 | 1,21 | 384 |
| TEAQ_17 | 3,88 | 1,18 | 384 |
| TEAQ_18 | 4,08 | 1,01 | 384 |
| TEAQ_19 | 4,42 | 0,80 | 384 |
| TEAQ_20 | 3,73 | 1,21 | 384 |
| TEAQ_21 | 3,61 | 1,39 | 384 |
| TEAQ_22 | 4,04 | 0,98 | 384 |
| TEAQ_23 | 2,46 | 1,40 | 384 |
| TEAQ_24 | 4,31 | 0,95 | 384 |
| TEAQ_25 | 3,13 | 1,38 | 384 |
| TEAQ_26 | 1,85 | 1,04 | 384 |
| TEAQ_27 | 3,07 | 1,20 | 384 |
| TEAQ_28 | 3,02 | 1,31 | 384 |
| TEAQ_29 | 4,47 | 0,77 | 384 |
| TEAQ_30 | 4,17 | 1,05 | 384 |
| TEAQ_31 | 3,89 | 1,15 | 384 |
| TEAQ_32 | 4,43 | 0,85 | 384 |
| TEAQ_33 | 4,29 | 0,98 | 384 |
| TEAQ_34 | 3,58 | 1,39 | 384 |
| TEAQ_35 | 2,38 | 1,17 | 384 |
| TEAQ_36 | 3,73 | 1,01 | 384 |
| TEAQ_37 | 2,24 | 1,13 | 384 |
| TEAQ_38 | 4,15 | 0,94 | 384 |
| TEAQ_39 | 3,49 | 1,42 | 384 |
| TEAQ_40 | 3,52 | 1,25 | 384 |
| TEAQ_41 | 4,59 | 0,68 | 384 |
| TEAQ_42 | 3,29 | 1,28 | 384 |
| TEAQ_43 | 3,94 | 1,11 | 384 |
| TEAQ_44 | 4,34 | 0,89 | 384 |

|         |      |      |     |
|---------|------|------|-----|
| TEAQ_45 | 3,12 | 1,25 | 384 |
| TEAQ_46 | 3,07 | 1,45 | 384 |
| TEAQ_47 | 4,18 | 0,91 | 384 |
| TEAQ_48 | 2,49 | 1,27 | 384 |
| TEAQ_49 | 2,95 | 1,32 | 384 |
| TEAQ_50 | 3,27 | 1,47 | 384 |
| TEAQ_51 | 3,86 | 1,11 | 384 |
| TEAQ_52 | 2,80 | 1,38 | 384 |

Table 2. Pearson correlations between items.

|     | Q1 | Q2 | Q3    | Q4     | Q5    | Q6    | Q7    | Q8    | Q9    | Q10   | Q11   | Q12   | Q13   | Q14   | Q15   | Q16   | Q17   | Q18   | Q19   | Q20    | Q21   | Q22    | Q23   | Q24   | Q25   | Q26    | Q27    | Q28   | Q29   | Q30   | Q31    | Q32   | Q33   | Q34    | Q35   | Q36    | Q37   | Q38    | Q39   | Q40    | Q41    | Q42   | Q43   | Q44   | Q45   | Q46   | Q47   | Q48   | Q49   | Q50   | Q51    | Q52   |       |       |       |
|-----|----|----|-------|--------|-------|-------|-------|-------|-------|-------|-------|-------|-------|-------|-------|-------|-------|-------|-------|--------|-------|--------|-------|-------|-------|--------|--------|-------|-------|-------|--------|-------|-------|--------|-------|--------|-------|--------|-------|--------|--------|-------|-------|-------|-------|-------|-------|-------|-------|-------|--------|-------|-------|-------|-------|
| Q1  | r  | 1  | .153  | .242   | .213  | .150  | .232  | 0.082 | .227  | .168  | .169  | .082  | .179  | .314  | .376  | .244  | .312  | .131  | .184  | .175   | .489  | .140   | .259  | 0.001 | .181  | -0.041 | .311   | .184  | .376  | .343  | .120   | .217  | .179  | .126   | .165  | .315   | .393  | .314   | .240  | -0.011 | 0.075  | .128  | 0.054 | .111  | .171  | .352  | 0.072 | .274  | .296  | 0.042 | 0.034  | .447  | .197  |       |       |
| Q1  | p  |    | 0.003 | <.001  | <.001 | 0.003 | <.001 | 0.108 | <.001 | <.001 | <.001 | 0.11  | <.001 | <.001 | <.001 | <.001 | 0.01  | <.001 | <.001 | <.001  | 0.006 | <.001  | 0.981 | <.001 | 0.422 | <.001  | <.001  | <.001 | <.001 | 0.019 | <.001  | 0.013 | 0.001 | <.001  | <.001 | <.001  | 0.836 | 0.141  | 0.012 | 0.287  | 0.03   | <.001 | 0.157 | <.001 | 0.042 | 0.034 | 0.509 | <.001 | <.001 |       |        |       |       |       |       |
| Q2  | r  |    | 1     | -0.007 | .244  | 0.095 | .140  | .608  | .219  | 0.069 | .235  | .211  | .184  | .254  | .135  | .217  | .334  | .320  | .215  | .138   | .227  | .128   | .254  | .213  | .200  | .167   | 0      | .145  | .199  | .243  | .209   | .136  | .225  | .179   | .188  | 0.067  | .166  | 0.055  | .254  | .171   | .502   | .217  | .283  | .260  | .201  | .190  | .194  | .294  | .192  | .305  | .481   | .188  | .255  |       |       |
| Q2  | p  |    |       | 0.89   | <.001 | 0.063 | 0.006 | <.001 | <.001 | 0.176 | <.001 | <.001 | <.001 | <.001 | 0.008 | <.001 | <.001 | <.001 | <.001 | 0.007  | <.001 | 0.012  | <.001 | <.001 | 0.001 | 0.996  | 0.005  | <.001 | <.001 | 0.007 | <.001  | <.001 | <.001 | <.001  | 0.191 | 0.001  | 0.286 | <.001  | <.001 | <.001  | <.001  | <.001 | <.001 | <.001 | <.001 | <.001 | <.001 | <.001 | <.001 | <.001 | <.001  | <.001 |       |       |       |
| Q3  | r  |    |       | 1      | 0.067 | 0.08  | .136  | 0.047 | 0.003 | 0.083 | 0.056 | 0.078 | 0.01  | .156  | .177  | 0.022 | .145  | 0.016 | 0.051 | -0.054 | .180  | -0.034 | .119  | 0.066 | 0.03  | 0.076  | .391   | 0.074 | .197  | 0.007 | -0.069 | 0.008 | 0.049 | -0.019 | .117  | .405   | .154  | .407   | 0.031 | -0.016 | -0.031 | -0.07 | 0.067 | 0.084 | 0.046 | .218  | 0.014 | 0.027 | .178  | 0.014 | -0.065 | .145  | 0.09  |       |       |
| Q3  | p  |    |       |        | 0.192 | 0.115 | 0.008 | 0.355 | 0.952 | 0.104 | 0.276 | 0.126 | 0.843 | 0.002 | <.001 | 0.668 | 0.005 | 0.758 | 0.321 | 0.293  | <.001 | 0.506  | 0.02  | 0.198 | 0.553 | 0.14   | <.001  | 0.146 | <.001 | 0.891 | 0.179  | 0.874 | 0.343 | 0.718  | 0.021 | <.001  | 0.002 | <.001  | 0.545 | 0.758  | 0.544  | 0.172 | 0.189 | 0.102 | 0.372 | <.001 | 0.783 | 0.598 | <.001 | 0.777 | 0.206  | 0.004 | 0.078 |       |       |
| Q4  | r  |    |       |        | 1     | .233  | .303  | .196  | .225  | .121  | .238  | .212  | .192  | .228  | .312  | .271  | .626  | .185  | .208  | .123   | .362  | .159   | .180  | 0.096 | .152  | 0.085  | 0.02   | .201  | .355  | .320  | .181   | .251  | .212  | .275   | .344  | 0.061  | .365  | .124   | .244  | .158   | .143   | .232  | .215  | .244  | .162  | .281  | 0.063 | .269  | .176  | .131  | .144   | .438  | .231  |       |       |
| Q4  | p  |    |       |        |       | <.001 | <.001 | <.001 | <.001 | 0.018 | <.001 | <.001 | <.001 | <.001 | <.001 | <.001 | <.001 | <.001 | 0.016 | <.001  | 0.002 | <.001  | 0.06  | 0.003 | 0.098 | 0.699  | <.001  | <.001 | <.001 | <.001 | <.001  | <.001 | <.001 | <.001  | 0.233 | <.001  | 0.015 | <.001  | 0.002 | 0.005  | <.001  | <.001 | <.001 | <.001 | <.001 | <.001 | <.001 | <.001 | <.001 | <.001 | <.001  | <.001 | <.001 | <.001 |       |
| Q5  | r  |    |       |        |       | 1     | .729  | .108  | .116  | .729  | .127  | .123  | 0.065 | .276  | .330  | .536  | .319  | .231  | .270  | .172   | .268  | .543   | .173  | .122  | 0.076 | .172   | 0.083  | .262  | .320  | .188  | .381   | .679  | .130  | .577   | .365  | .156   | .353  | .159   | .130  | .138   | 0.007  | .172  | .242  | .218  | 0.075 | .318  | .137  | .108  | .143  | 0.096 | 0.074  | .295  | .225  |       |       |
| Q5  | p  |    |       |        |       |       | <.001 | 0.034 | 0.023 | <.001 | 0.013 | 0.016 | 0.206 | <.001 | <.001 | <.001 | <.001 | <.001 | <.001 | <.001  | <.001 | <.001  | <.001 | 0.016 | 0.139 | <.001  | 0.105  | <.001 | <.001 | <.001 | <.001  | <.001 | <.001 | <.001  | <.001 | <.001  | <.001 | <.001  | <.001 | <.001  | <.001  | <.001 | <.001 | <.001 | <.001 | <.001 | <.001 | <.001 | <.001 | <.001 | <.001  | <.001 | <.001 | <.001 |       |
| Q6  | r  |    |       |        |       |       | 1     | 0.09  | 0.076 | .669  | 0.053 | .144  | .103  | .380  | .452  | .538  | .388  | .236  | .290  | .191   | .431  | .474   | .163  | .101  | .130  | .153   | 0.088  | .233  | .437  | .241  | .296   | .586  | .152  | .500   | .349  | .129   | .444  | .160   | .199  | .149   | 0.028  | .157  | .235  | .271  | .105  | .365  | .146  | .175  | .236  | 0.068 | 0.052  | .399  | .334  |       |       |
| Q6  | p  |    |       |        |       |       |       | 0.079 | 0.139 | <.001 | 0.303 | 0.005 | 0.043 | <.001 | <.001 | <.001 | <.001 | <.001 | <.001 | <.001  | <.001 | <.001  | 0.001 | 0.048 | 0.111 | 0.003  | 0.085  | <.001 | <.001 | <.001 | <.001  | <.001 | <.001 | <.001  | <.001 | <.001  | <.001 | <.001  | <.001 | <.001  | <.001  | <.001 | <.001 | <.001 | <.001 | <.001 | <.001 | <.001 | <.001 | <.001 | <.001  | <.001 | <.001 | <.001 | <.001 |
| Q7  | r  |    |       |        |       |       |       | 1     | 0.077 | .206  | .222  | .150  | .261  | .136  | .176  | .256  | .264  | .206  | 0.093 | .149   | .207  | .208   | .211  | .115  | .150  | 0.011  | .144   | .219  | .184  | .205  | .164   | .183  | .140  | .203   | 0.048 | .141   | 0.029 | .197   | .185  | .533   | .242   | .301  | .261  | .240  | .176  | .159  | .179  | .203  | .435  | .454  | .126   | .268  |       |       |       |
| Q7  | p  |    |       |        |       |       |       |       | 0.077 | <.001 | 0.131 | <.001 | <.001 | 0.003 | <.001 | 0.007 | <.001 | <.001 | <.001 | <.001  | <.001 | <.001  | <.001 | 0.024 | 0.003 | 0.823  | 0.005  | <.001 | <.001 | <.001 | <.001  | <.001 | <.001 | <.001  | <.001 | <.001  | <.001 | <.001  | <.001 | <.001  | <.001  | <.001 | <.001 | <.001 | <.001 | <.001 | <.001 | <.001 | <.001 | <.001 | <.001  | <.001 | <.001 | <.001 | <.001 |
| Q8  | r  |    |       |        |       |       |       |       | 1     | 0.087 | .384  | .329  | .342  | .221  | .186  | .198  | .238  | .267  | .174  | .187   | .267  | .135   | .423  | .177  | .263  | .101   | -0.001 | .132  | .149  | .400  | .219   | .208  | .348  | .162   | .221  | 0.062  | .206  | 0.003  | .576  | .001   | <.001  | <.001 | <.001 | <.001 | <.001 | <.001 | <.001 | <.001 | <.001 | <.001 | <.001  | <.001 | <.001 | <.001 |       |
| Q8  | p  |    |       |        |       |       |       |       |       | 0.089 | <.001 | <.001 | <.001 | <.001 | <.001 | <.001 | <.001 | <.001 | <.001 | <.001  | <.001 | 0.008  | <.001 | <.001 | <.001 | 0.049  | 0.992  | 0.01  | 0.004 | <.001 | <.001  | <.001 | <.001 | 0.001  | <.001 | 0.227  | <.001 | 0.309  | <.001 | <.001  | <.001  | <.001 | <.001 | <.001 | <.001 | <.001 | 0.007 | 0.005 | <.001 | 0.002 | 0.014  | <.001 | <.001 | <.001 | <.001 |
| Q9  | r  |    |       |        |       |       |       |       |       | 1     | 0.034 | .113  | 0.032 | .230  | .283  | .461  | .180  | .150  | .229  | 0.063  | .223  | .543   | .116  | 0.01  | 0.041 | .101   | .139   | .206  | .288  | .127  | .277   | .656  | 0.045 | .477   | .335  | 0.099  | .360  | .103   | 0.058 | 0.097  | 0.004  | .116  | .155  | .110  | 0.037 | .287  | 0.088 | 0.094 | .186  | 0.064 | 0.071  | .233  | .221  |       |       |
| Q9  | p  |    |       |        |       |       |       |       |       |       | 0.511 | 0.027 | 0.529 | <.001 | <.001 | <.001 | <.001 | 0.003 | <.001 | 0.216  | <.001 | <.001  | 0.023 | 0.852 | 0.423 | 0.048  | 0.006  | <.001 | 0.013 | <.001 | 0.382  | <.001 | <.001 | 0.053  | <.001 | 0.043  | 0.26  | 0.057  | 0.945 | 0.023  | 0.002  | 0.032 | 0.473 | <.001 | 0.084 | 0.066 | <.001 | 0.209 | 0.167 | <.001 | <.001  | <.001 | <.001 |       |       |
| Q10 | r  |    |       |        |       |       |       |       |       |       | 1     | .520  | .364  | .231  | .119  | .181  | .248  | .331  | .173  | .194   | .293  | .119   | .395  | .330  | .276  | .247   | 0.034  | .176  | .139  | .294  | .154   | .111  | .354  | .141   | .308  | 0.021  | 0.098 | 0.046  | .386  | .318   | .185   | .323  | .332  | .307  | .435  | .116  | .480  | .493  | .160  | .220  | .172   | .167  | .171  |       |       |
| Q10 | p  |    |       |        |       |       |       |       |       |       |       | <.001 | <.001 | <.001 | 0.02  | <.001 | <.001 | <.001 | <.001 | <.001  | 0.019 | <.001  | <.001 | <.001 | <.001 | <.001  | <.001  | <.001 | 0.029 | <.001 | 0.006  | <.001 | 0.686 | 0.055  | 0.364 | <.001  | <.001 | <.001  | <.001 | <.001  | <.001  | <.001 | 0.023 | <.001 | <.001 | 0.002 | <.001 | <.001 | <.001 | <.001 | <.001  | <.001 | <.001 | <.001 |       |
| Q11 | r  |    |       |        |       |       |       |       |       |       |       | 1     | .343  | .287  | .210  | .159  | .285  | .368  | .239  | .140   | .336  | 0.068  | .312  | .406  | .286  | .355   | 0.043  | .224  | .205  | .243  | .127   | .115  | .254  | .198   | .411  | -0.041 | .216  | -0.046 | .320  | .474   | 0.08   | .299  | .462  | .452  | .328  | .198  | .468  | .524  | .259  | .193  | .128   | .150  | .258  |       |       |
| Q11 | p  |    |       |        |       |       |       |       |       |       |       |       | <.001 | <.001 | <.001 | 0.002 | <.001 | <.001 | <.001 | <.001  | 0.006 | <.001  | 0.182 | <.001 | <.001 | 0.397  | <.001  | <.001 | <.001 | <.001 | 0.013  | 0.024 | <.001 | <.001  | 0.424 | <.001  | 0.372 | <.001  | <.001 | 0.118  | <.001  | <.001 | <.001 | <.001 | <.001 | <.001 | <.001 | <.001 | <.001 | <.001 | <.001  | <.001 | <.001 | <.001 |       |
| Q12 | r  |    |       |        |       |       |       |       |       |       |       |       | 1     | .126  | .165  | .148  | .258  | .351  | .137  | .379   | .268  | 0.064  | .489  | .296  | .665  | .332   | .124   | .108  | .104  | .327  | .182   | 0.068 | .472  | .142   | .231  | .120   | .175  | .112   | .301  | .419   | .161   | .614  | .270  | .346  | .454  | .157  | .222  | .463  | 0.083 | 0.063 | 0.08   | .156  | 0.055 |       |       |
| Q12 | p  |    |       |        |       |       |       |       |       |       |       |       |       | 0.013 | 0.001 | 0.004 | <.001 | <.001 | 0.007 | <.001  | <.001 | 0.211  | <.001 | <.001 | <.001 | 0.015  | 0.034  | 0.041 | <.001 | <.001 | 0.186  | <.001 | 0.005 | <.001  | 0.019 | <.001  | 0.028 | <.001  | <.001 | 0.002  | <.001  | <.001 | <.001 | <.001 | <.001 | <.001 | <.001 | <.001 | <.001 | <.001 | <.001  | <.001 | <.001 | <.001 | <.001 |
| Q13 | r  |    |       |        |       |       |       |       |       |       |       |       |       | 1     | .508  | .307  | .421  | .325  | .234  | .143   | .513  | .199   | .272  | .163  | 0.065 | 0.076  | .146   | .163  | .481  | .307  | .211   | .234  | .195  | .309   | .327  | .109   | .492  | 0.075  | .294  | .152   | .171   | .180  | .243  | .313  | .232  | .345  | .209  | .287  | .495  | .154  | .162   | .498  | .698  |       |       |
| Q13 | p  |    |       |        |       |       |       |       |       |       |       |       |       |       | <.001 | <.001 | <.001 | <.001 | <.001 | 0.005  | <.001 | <.001  | <.001 | <.001 | 0.138 | 0.004  | 0.001  | <.001 | <.001 | 0.032 | <.001  | 0.032 | <.001 |        |       |        |       |        |       |        |        |       |       |       |       |       |       |       |       |       |        |       |       |       |       |
